# Supplementary material
Source: Springer Nature journal article supplement (https://hal.science/hal-01290561v1/file/13567_2013_368_MOESM5_ESM.pdf)

Day 8 p.i.

Day 16 p.i.

Animal 1

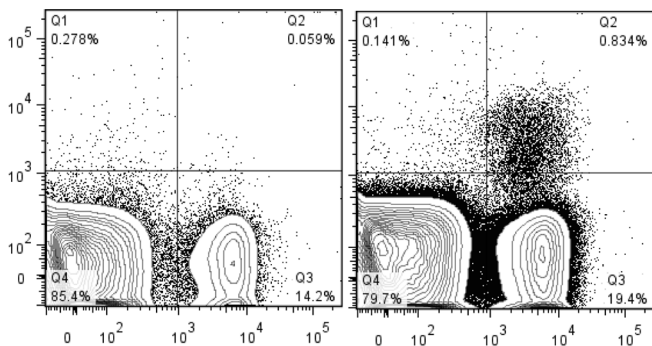

Day 8 p.i.

Day 15 p.i.

Animal 2

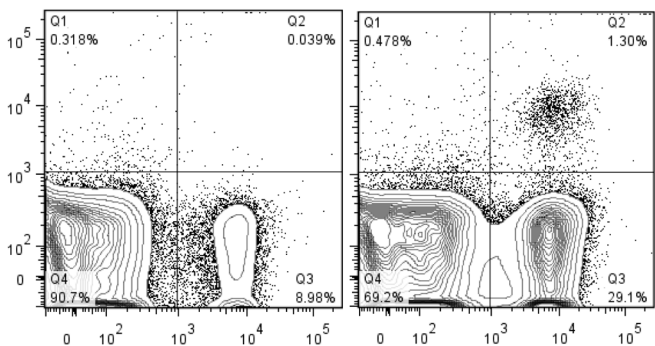

Day 8 p.i.

Day 17 p.i.

Animal 3

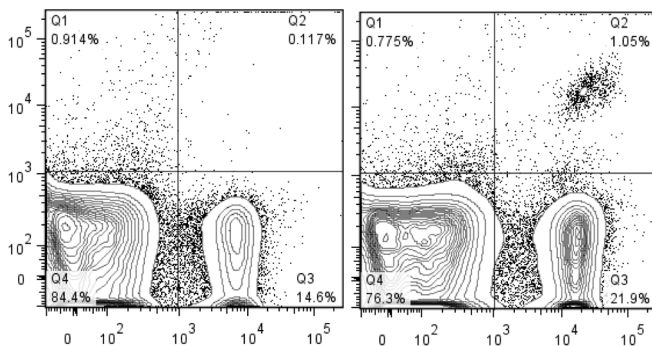

CD8+ (PerCP)

Tp1+ (PE)

Supplement: MOESM5 [file 13567_2013_368_MOESM5_ESM.pdf]
